# Supplementary material
Source: HighWire-hosted journal article supplement (https://www.cmaj.ca/highwire/filestream/150371/field_highwire_adjunct_files/5/231358-res-6-at.pdf)
Supplement: 231358-res-6-at.pdf [file 231358-res-6-at.pdf]

**Appendix 6: Proportion adherent (per 100) of high-risk childhood cancer survivors by risk type, by eligibility (February 28, 2020 or end of follow-up)**

| Description                                                                    | Colorectal cancer |                     | Breast Cancer |                     |
|--------------------------------------------------------------------------------|-------------------|---------------------|---------------|---------------------|
|                                                                                | N                 | Proportion adherent | N             | Proportion adherent |
| <b>Overall</b>                                                                 | 327               | 12.84 (9.26-17.36)  | 234           | 6.41 (3.59-10.57)   |
| <b>Those previously eligible for screening in the previous guidelines</b>      | 94                | 7.45 (2.99-15.34)   | 140           | 6.43 (2.94-12.2)    |
| <b>Those who only became newly eligible on the most recent guidelines (V5)</b> | 233               | 11.59 (7.64-16.86)  | 94            | 4.26 (1.16-10.9)    |
